# Supplementary material
Source: HighWire-hosted journal article supplement (https://bmjopen.bmj.com/content/9/12/e033128)
Supplement: inline-supplementary-material-5 [file inline-supplementary-material-5.pdf]

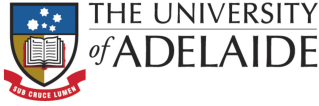

## Appendix-5: Focus group discussion guide: Patient and carers

Thank you for consenting to be part of this research. Through this interview, I wish to explore your perspective around potential development of an electronic health information education platform for older people with a hip fracture injury.

### Context

Question-1: Can you please recollect and narrate about the circumstances in which this injury occurred to you or your family member/relative and the journey so far?

*Probe: fall/accident, place of residence, care seeking decision, carer and support available, reaching hospital, care in the hospital*

Question-2: In your opinion, what are the important things that will help you and your family member/carer recover well after the discharge from this hospital?

*Probe: carer support, residence, independence, quality of life, access to information, services*

### Content

Question-3: How important do you feel and also as a carer, around right kind of health information will help better recovery and what challenges you anticipate in accessing this information?

*Probe: Prior experience, information leaflet/booklet, support-doctor/nursing staff/carer/friends, physical/disability concern*

Question-4: What areas of health information you are interested in knowing now and after you or your family member/relative gets discharged from this hospital?

*Probe: Any particular area of concern, in general for people in similar situation, WHO ICOPE- elaborate, different platforms, convenience*

### System

Question-5: How would you consider availability of health information, electronically?

*Probe: current and likelihood to access, any example, challenges, motivation and optimism*

Question-6: What would you recommend to the developers of electronic health education platform to consider for patients' hip fractures once they are discharged from the hospital?

*Probe: usability, functionalities,*
