# Supplementary material
Source: HighWire-hosted journal article supplement (https://bmjopen.bmj.com/content/9/12/e033128)
Supplement: inline-supplementary-material-6 [file inline-supplementary-material-6.pdf]

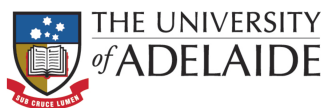

## Appendix-6: Focus group discussion guide: HCPs

Thank you for consenting to be part of this research. Through this interview, I wish to explore your perspective around potential development of an electronic health information education platform for older people with a hip fracture injury.

### Context

Question-1: What is your experience, in general, each of you have with respect to your disciplinary area of practice while coming across older people with hip fractures admitted to the hospital or attending clinic/consultation for treatment?

*Probe: physical status, gender, education level, empowerment, priority, recovery needs, care pathway, role of carer*

Question-2: What is your perspective, particularly around health literacy in this group of population?

*Probe: health information needs/areas, existing provision, difficulty in accessing, possible improvement solutions, ehealth*

### Content

Question-3: In your opinion, what are the important areas of health information for patients recovering from a hip fracture injury after their discharge from the hospital?

*Probe: clinical recovery, functional improvement, WHO ICOPE-elaborate, multiple medical conditions, other issues*

Question-4: In your opinion, do you think there is a need or scope for improving the quality of health information for this group of patients? Do you have any possible suggestions or solutions in this direction?

*Probe: barriers and facilitators, role of carers and community providers (health and social care), different platforms including ehealth or IT solution*

### System

Question-5: Can you please recollect from your previous experience of coming across any electronic platform used for patient education and/or service delivery? Or any comment in general about the use of IT/ehealth solutions?

*Probe: setting, usage and function, challenges, possible learning and suggestive improvements*

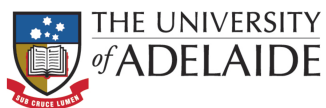

## Appendix-6: Focus group discussion guide: HCPs

Questiona-6: Can you please elaborate factors, in your opinion, needs to be taken into consideration while designing an ehealth platform for such group of patients?

*Probe: system functionalities, patient response, existing system integration*
